# Supplementary material for: Genuine quadruple bonds between two main-group atoms. Chemical bonding in AeF− (Ae = Be–Ba) and isoelectronic EF (E = B–Tl) and the particular role of d orbitals in covalent interactions of heavier alkaline-earth atoms
Source: Royal Society of Chemistry journal article supplement (doi:10.1039/d3sc00830d), 2023-01-01
Supplement: d3sc00830d1.pdf [file d3sc00830d1.pdf]

## Supporting Information

### **Genuine Quadruple Bonds between Two Main-Group Atoms. Chemical Bonding in $AeF^-$ ( $Ae = Be - Ba$ ) and Isoelectronic $EF$ ( $E = B - Tl$ ) and the Particular Role of $d$ Orbitals in Covalent Interactions of Heavier Alkaline-Earth Atoms**

Ruiqin Liu,<sup>a</sup> Lei Qin<sup>a</sup>, Zhaoyin Zhang<sup>a</sup>, Lili Zhao<sup>a,\*</sup>, Filip Sagan<sup>b</sup>, Mariusz Mitoraj<sup>b,\*</sup>, Gernot Frenking<sup>a,c,\*</sup>

<sup>a</sup>Institute of Advanced Synthesis, School of Chemistry and Molecular Engineering, State Key Laboratory of Materials-Oriented Chemical Engineering, Nanjing Tech University, Nanjing 211816, China.

<sup>b</sup>Department of Theoretical Chemistry, Faculty of Chemistry, Jagiellonian University, R. Gronostajowa 2, 30-387 Cracow, Poland

<sup>c</sup>Fachbereich Chemie, Philipps-Universität Marburg, Hans-Meerwein-Strasse 4, D-35043 Marburg, Germany.

Email: [ias\\_llzhao@njtech.edu.cn](mailto:ias_llzhao@njtech.edu.cn); [mitoraj@chemia.uj.edu.pl](mailto:mitoraj@chemia.uj.edu.pl); [frenking@chemie.uni-marburg.de](mailto:frenking@chemie.uni-marburg.de)

### **Table of Contents**

|                                                         |    |
|---------------------------------------------------------|----|
| EDA-NOCV analysis of $MgF^-$ .....                      | 2  |
| EDA-NOCV analysis of $SrF^-$ .....                      | 3  |
| EDA-NOCV analysis of $BaF^-$ .....                      | 4  |
| EDA-NOCV analysis of $EF$ ( $E = B, Al, In, Tl$ ) ..... | 5  |
| Molecular orbitals of $AeF^-$ and $EF$ .....            | 8  |
| Coordinates and energies .....                          | 13 |

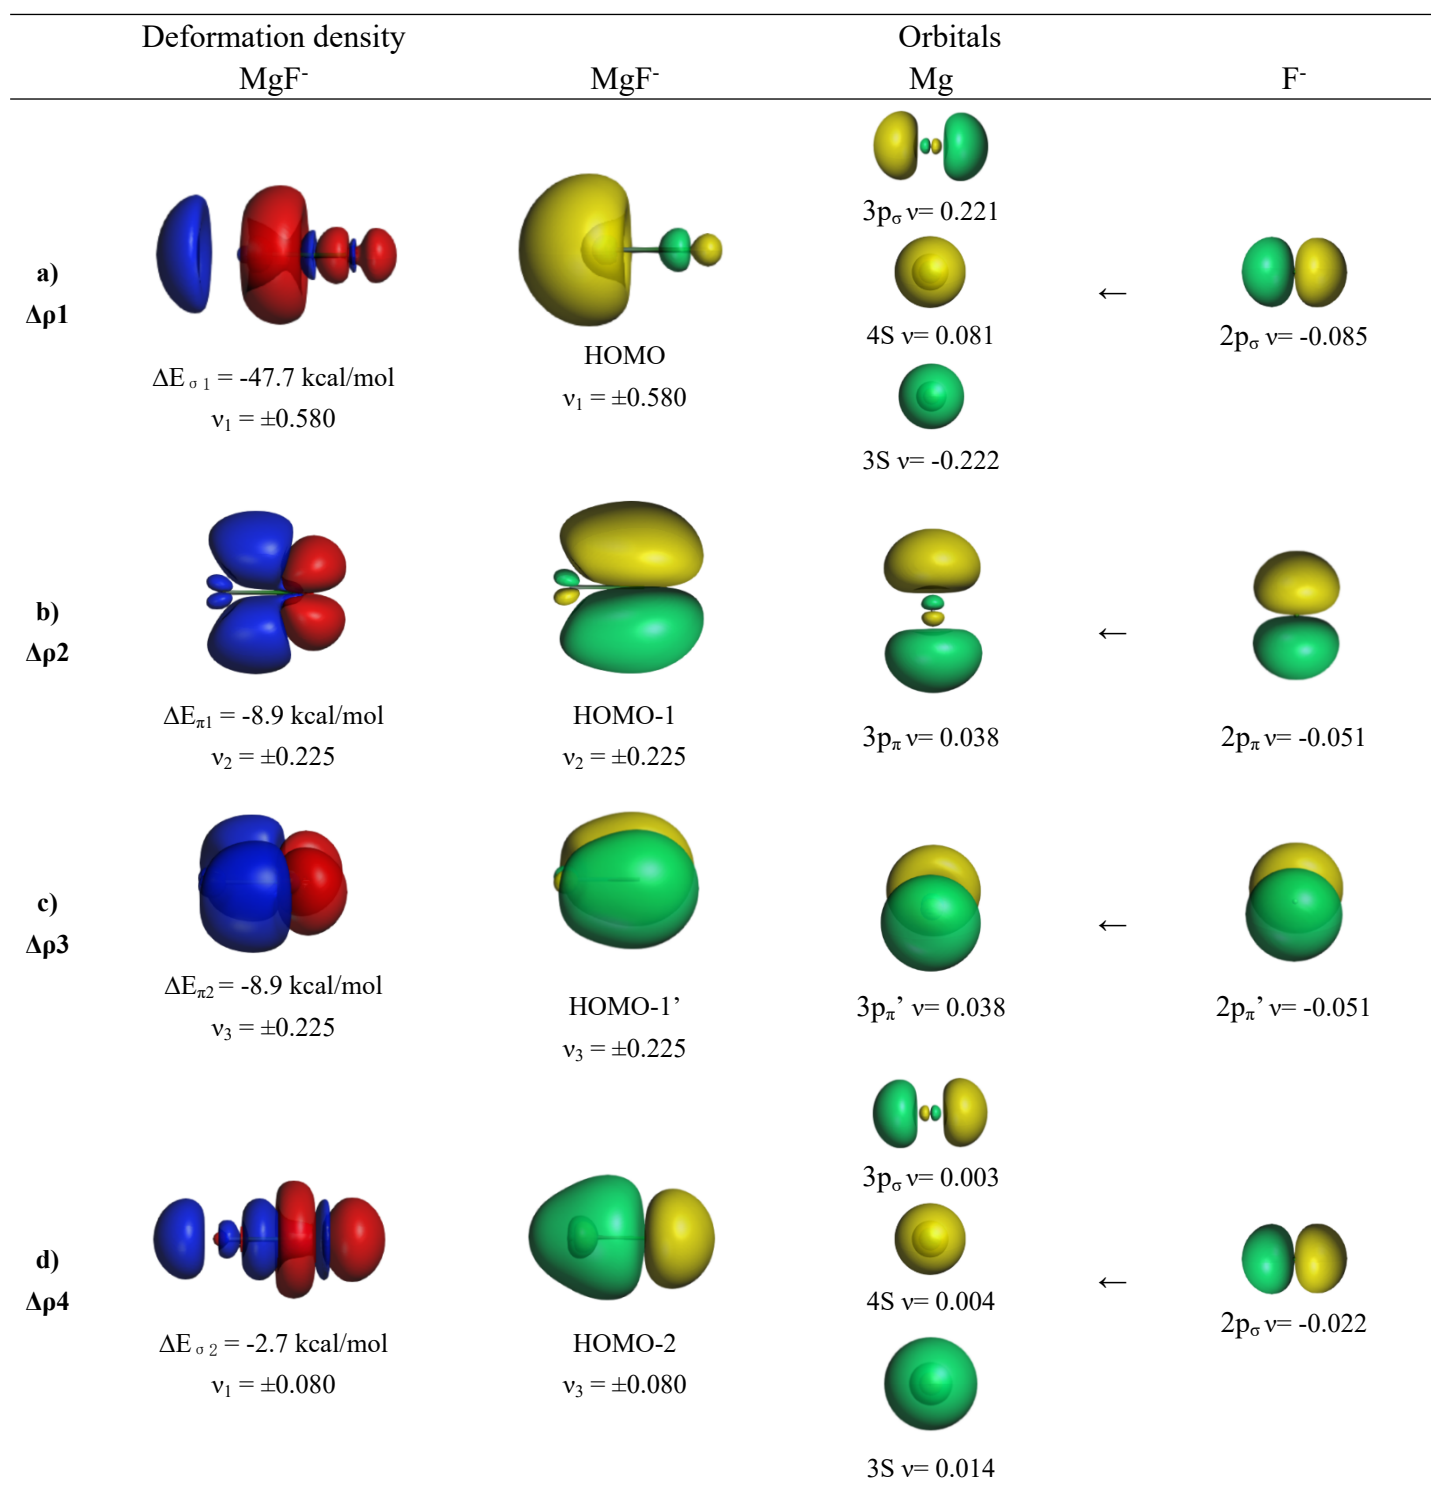

**Figure S1:** Plot of the deformation densities  $\Delta\rho$  of the four most important orbital interactions in MgF<sup>-</sup> which indicate the charge flow red→blue. Shape of the most important AOs of Mg and

$F^-$  which built the MOs of  $MgF^-$ . The eigenvalues  $v$  give the relative size of the charge transfer.

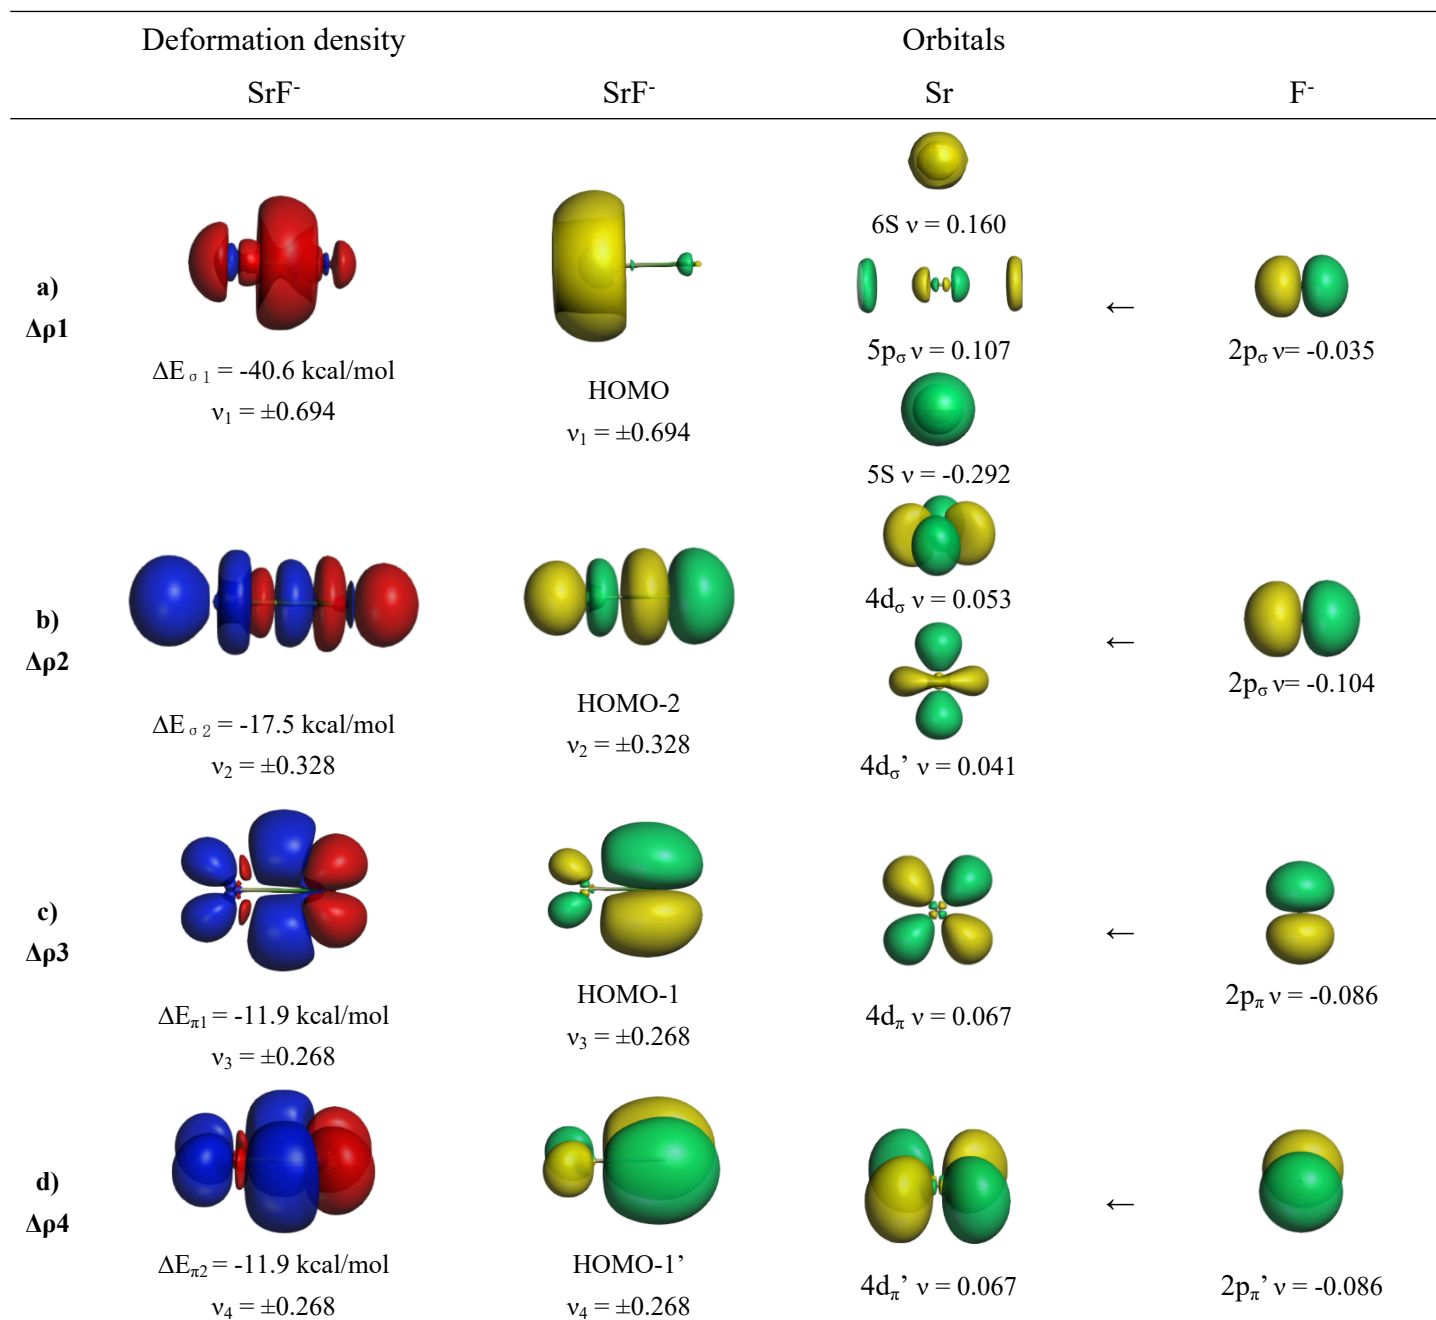

**Figure S2:** Plot of the deformation densities  $\Delta\rho$  of the four most important orbital interactions in SrF<sup>-</sup> which indicate the charge flow red→blue. Shape of the most important AOs of Sr and F<sup>-</sup> which built the MOs of SrF<sup>-</sup>. The eigenvalues  $v$  give the relative size of the charge transfer.

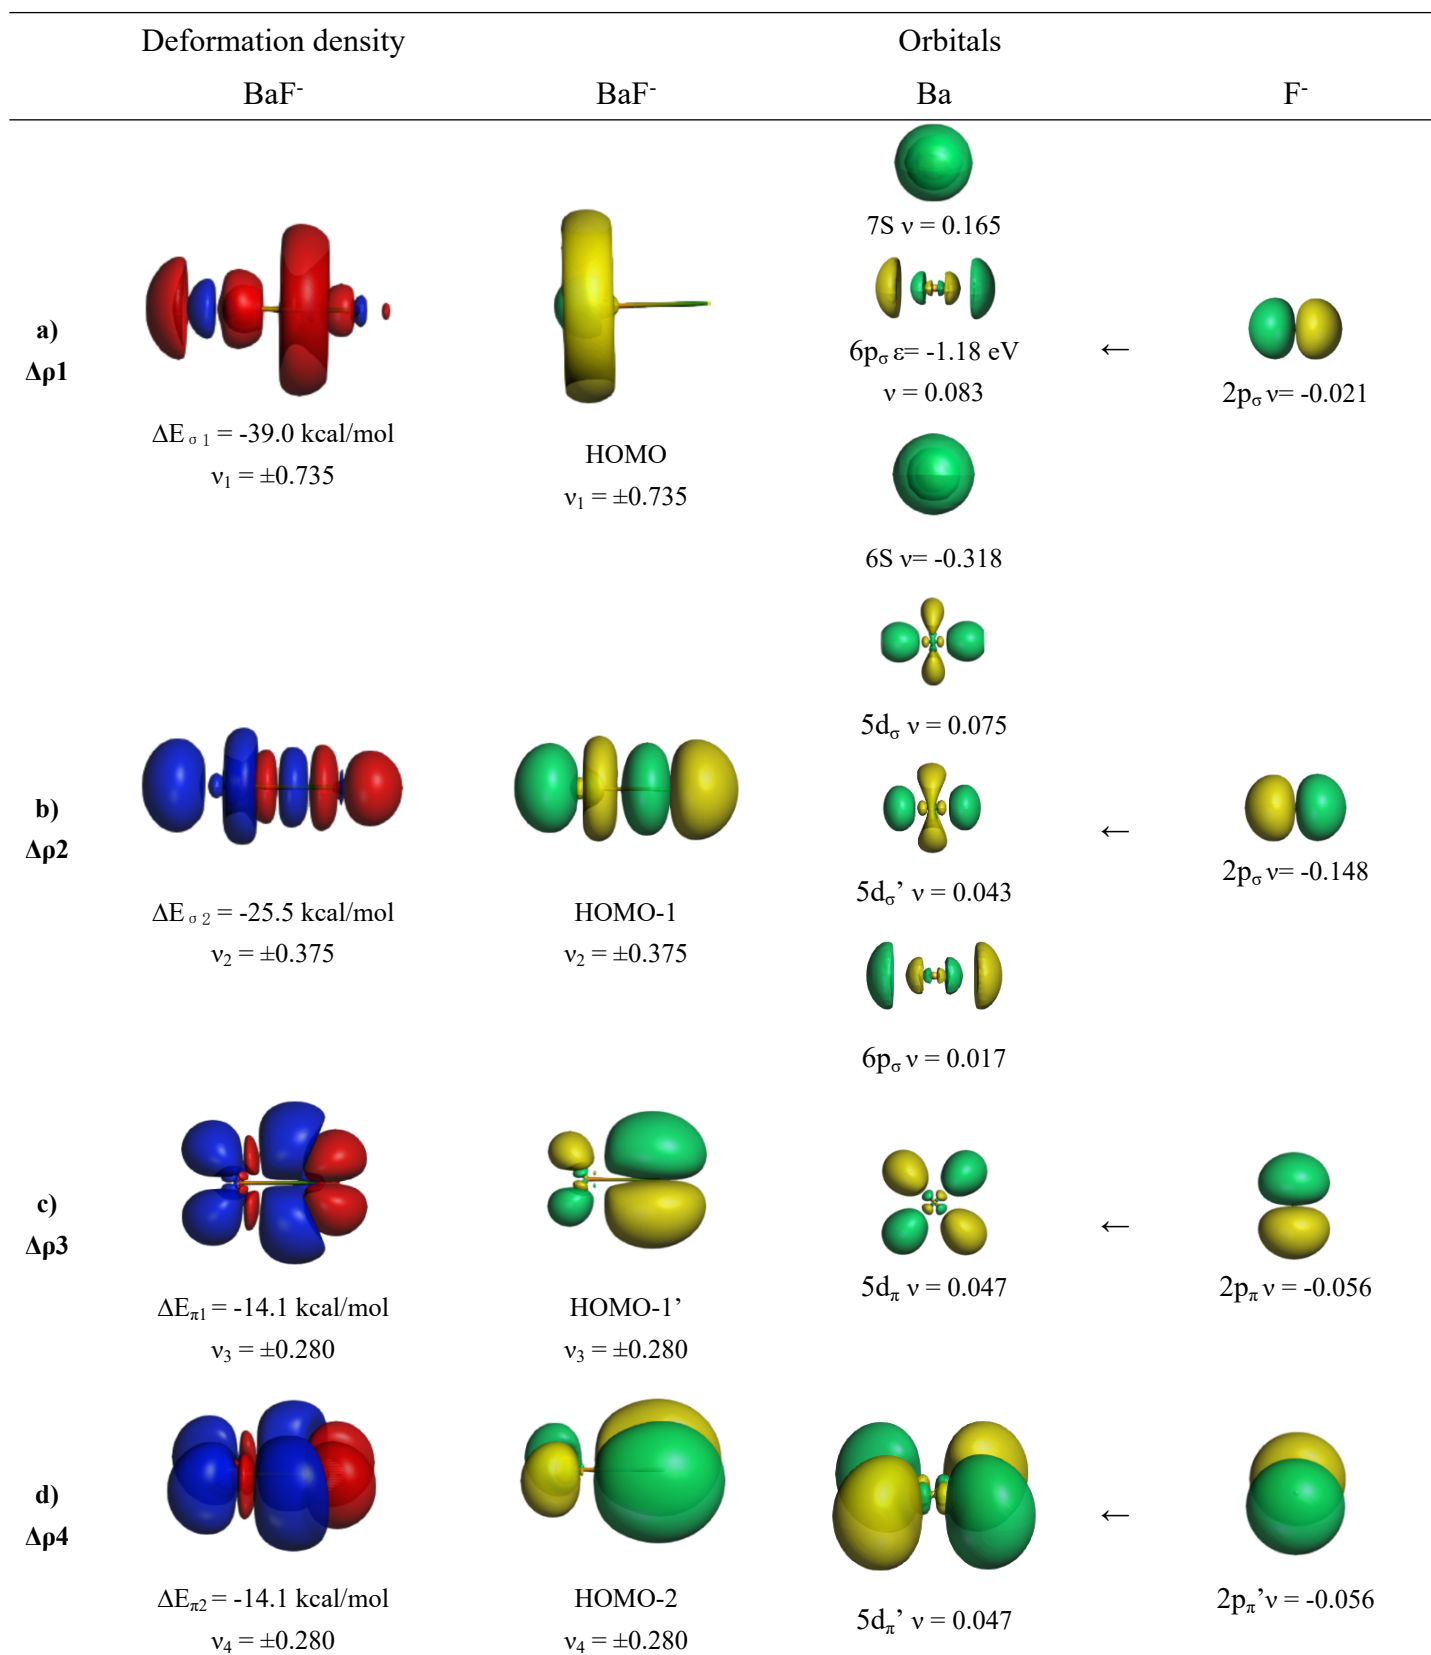

**Figure S3:** Plot of the deformation densities  $\Delta\rho$  of the four most important orbital interactions in BaF<sup>-</sup> which indicate the charge flow red→blue. Shape of the most important AOs of Ba and F<sup>-</sup> which built the MOs of BaF<sup>-</sup>. The eigenvalues  $v$  give the relative size of the charge transfer.

|                | Deformation density                                                                                                                                         | Orbitals                                                                                                            |                                                                                                                  |                                                                                                                  |
|----------------|-------------------------------------------------------------------------------------------------------------------------------------------------------------|---------------------------------------------------------------------------------------------------------------------|------------------------------------------------------------------------------------------------------------------|------------------------------------------------------------------------------------------------------------------|
|                | EF                                                                                                                                                          | EF                                                                                                                  | E (2P)                                                                                                           | F (2P)                                                                                                           |
| <b>AIF</b>     |                                                                                                                                                             |                                                                                                                     |                                                                                                                  |                                                                                                                  |
| $\Delta\rho_1$ | 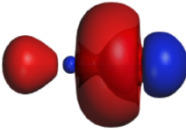<br>$\Delta E_{\sigma_1} = -261.7 \text{ kcal/mol}$<br>$v_1 = \pm 1.235$   | <br>HOMO<br>$v_1 = \pm 1.235$      | <br>$3p_{\sigma} v = -0.749$   | <br>$2p_{\sigma} v = 0.818$   |
| $\Delta\rho_2$ | <br>$\Delta E_{\pi_1} = -9.4 \text{ kcal/mol}$<br>$v_2 = \pm 0.304$        | <br>HOMO-1<br>$v_2 = \pm 0.304$    | <br>$3p_{\pi} v = 0.065$       | <br>$2p_{\pi} v = -0.102$     |
| $\Delta\rho_3$ | <br>$\Delta E_{\pi_2} = -9.4 \text{ kcal/mol}$<br>$v_3 = \pm 0.304$       | <br>HOMO-1'<br>$v_3 = \pm 0.304$  | <br>$3p_{\pi}' v = 0.065$     | <br>$2p_{\pi}' v = -0.102$   |
| <b>InF</b>     |                                                                                                                                                             |                                                                                                                     |                                                                                                                  |                                                                                                                  |
| $\Delta\rho_1$ | <br>$\Delta E_{\sigma_1} = -191.1 \text{ kcal/mol}$<br>$v_1 = \pm 1.220$ | <br>HOMO<br>$v_1 = \pm 1.220$    | <br>$5p_{\sigma} v = -0.774$ | <br>$2p_{\sigma} v = 0.790$ |
| $\Delta\rho_2$ | <br>$\Delta E_{\pi_1} = -4.0 \text{ kcal/mol}$<br>$v_2 = \pm 0.311$      | <br>HOMO-1<br>$v_2 = \pm 0.311$  | <br>$5p_{\pi} v = 0.057$     | <br>$2p_{\pi} v = -0.070$   |
| $\Delta\rho_3$ | <br>$\Delta E_{\pi_2} = -4.0 \text{ kcal/mol}$<br>$v_3 = \pm 0.311$      | <br>HOMO-1'<br>$v_3 = \pm 0.311$ | <br>$5p_{\pi}' v = 0.057$    | <br>$2p_{\pi}' v = -0.070$  |
| <b>TIF</b>     |                                                                                                                                                             |                                                                                                                     |                                                                                                                  |                                                                                                                  |

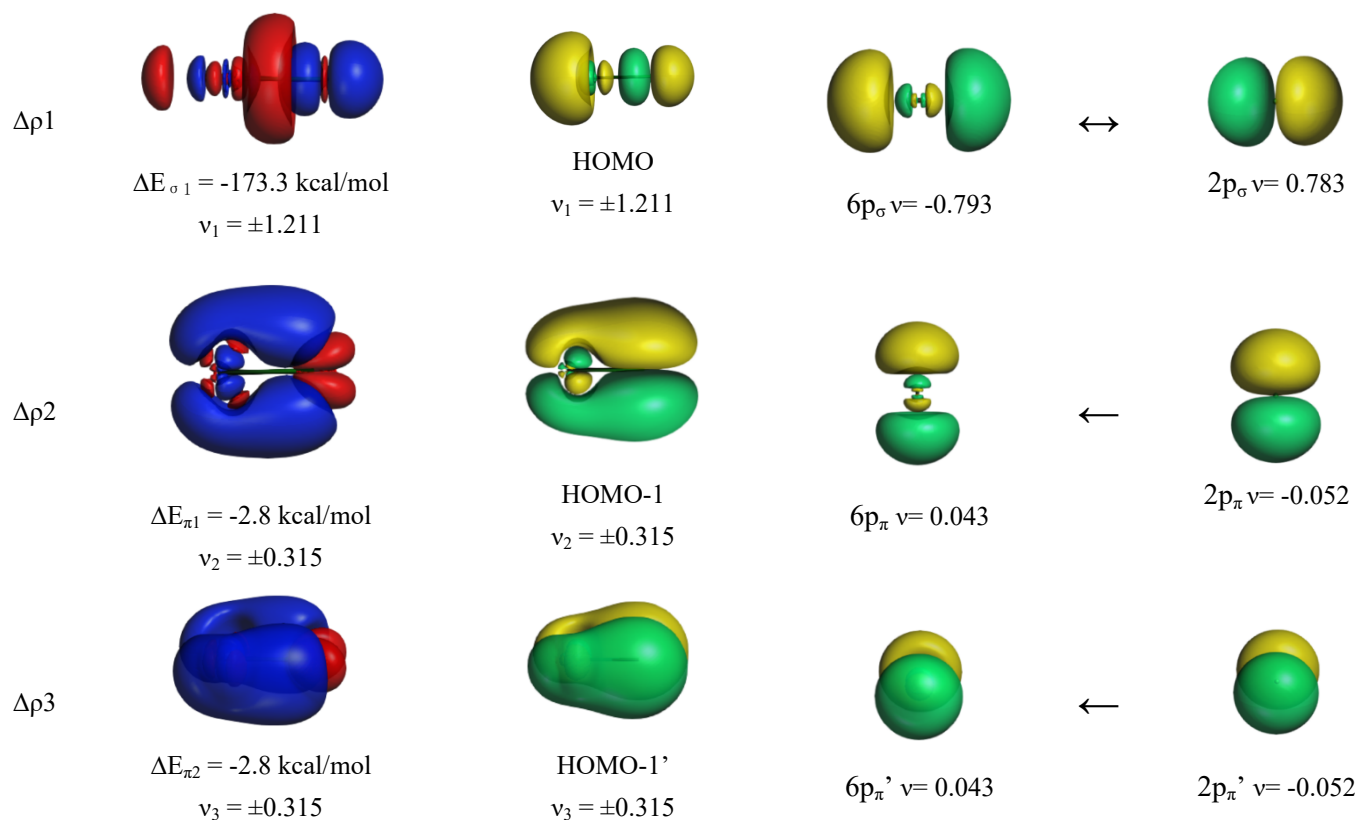

**Figure S4.** Plot of the deformation densities  $\Delta\rho$  of the three most important orbital interactions in AlF, InF and TlF which indicate the charge flow red $\rightarrow$ blue. Shape of the most important AOs of the atoms which built the MOs of EF. The eigenvalues  $v$  give the relative size of the charge transfer.

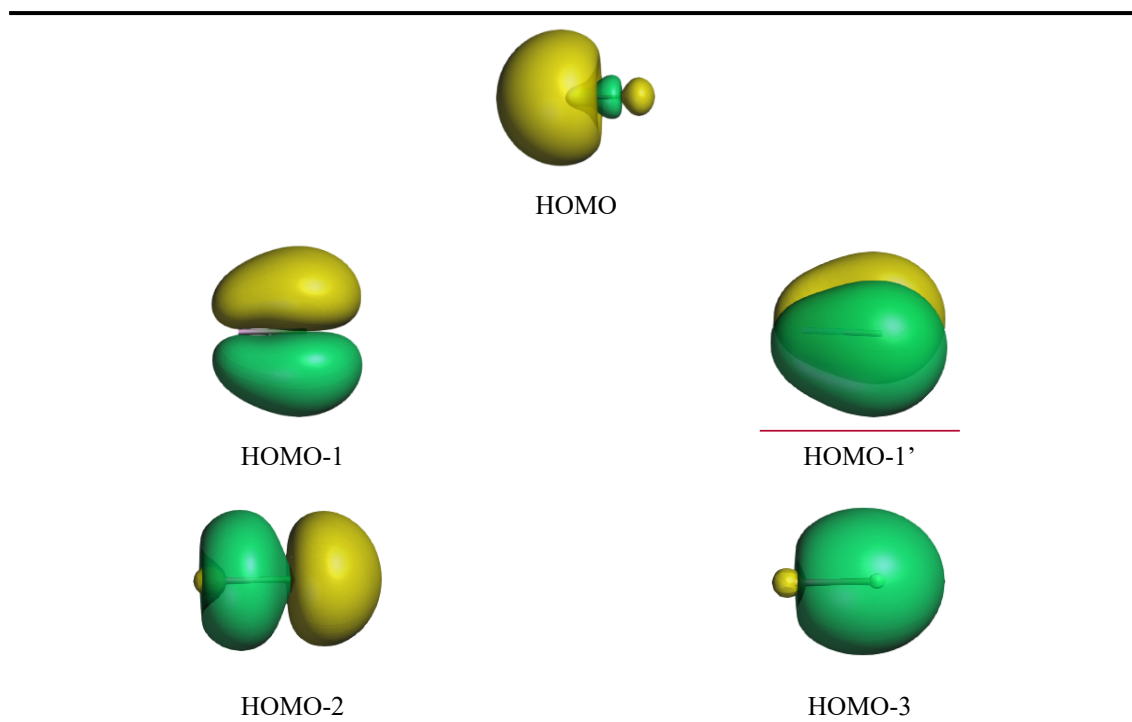

**Figure S5.** Molecular orbital results of BF at the BP86/DZP//BP86/def2-QZVPP level of theory.

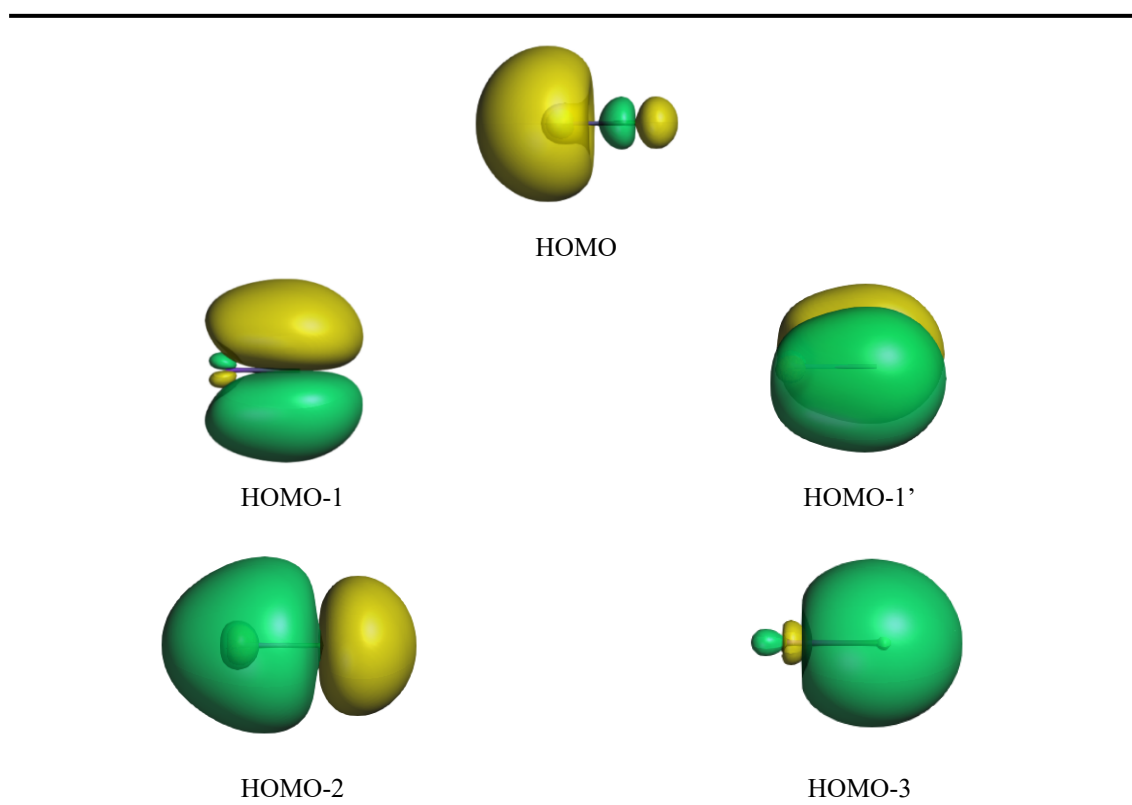

**Figure S6.** Molecular orbital results of AlF at the BP86/DZP//BP86/def2-QZVPP level of theory.



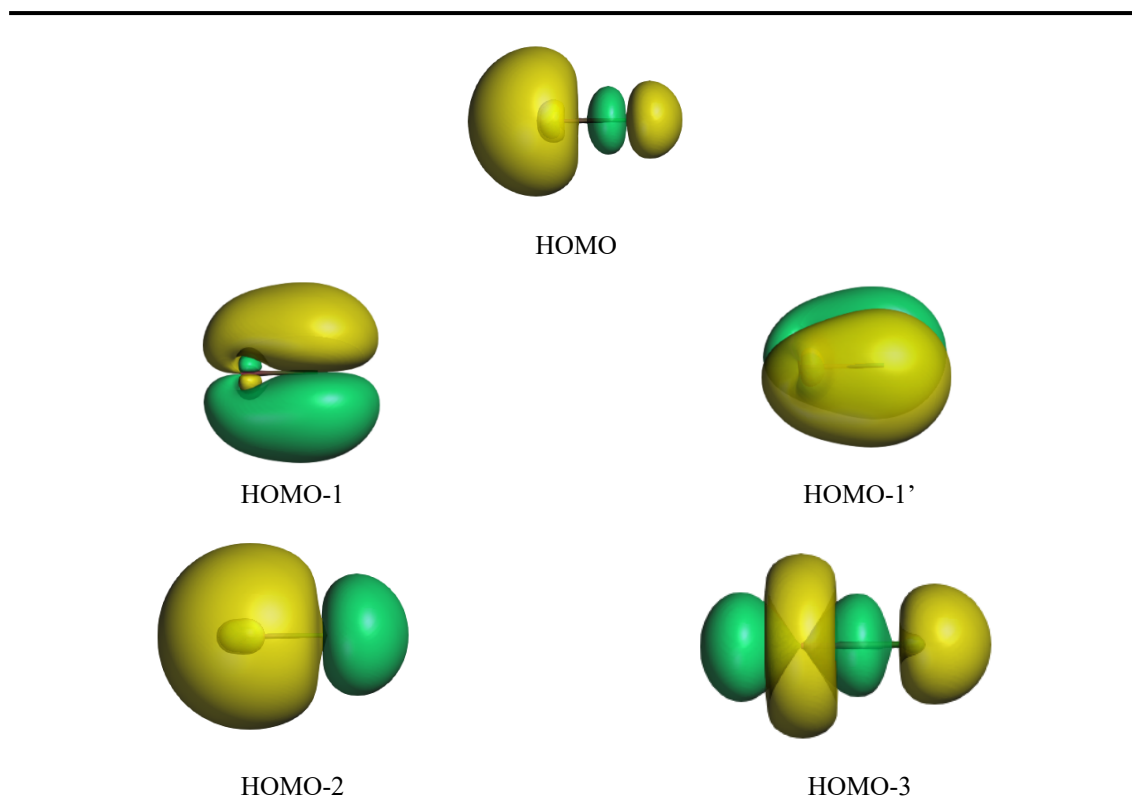

**Figure S7.** Molecular orbital results of GaF at the BP86/DZP//BP86/def2-QZVPP level of theory.

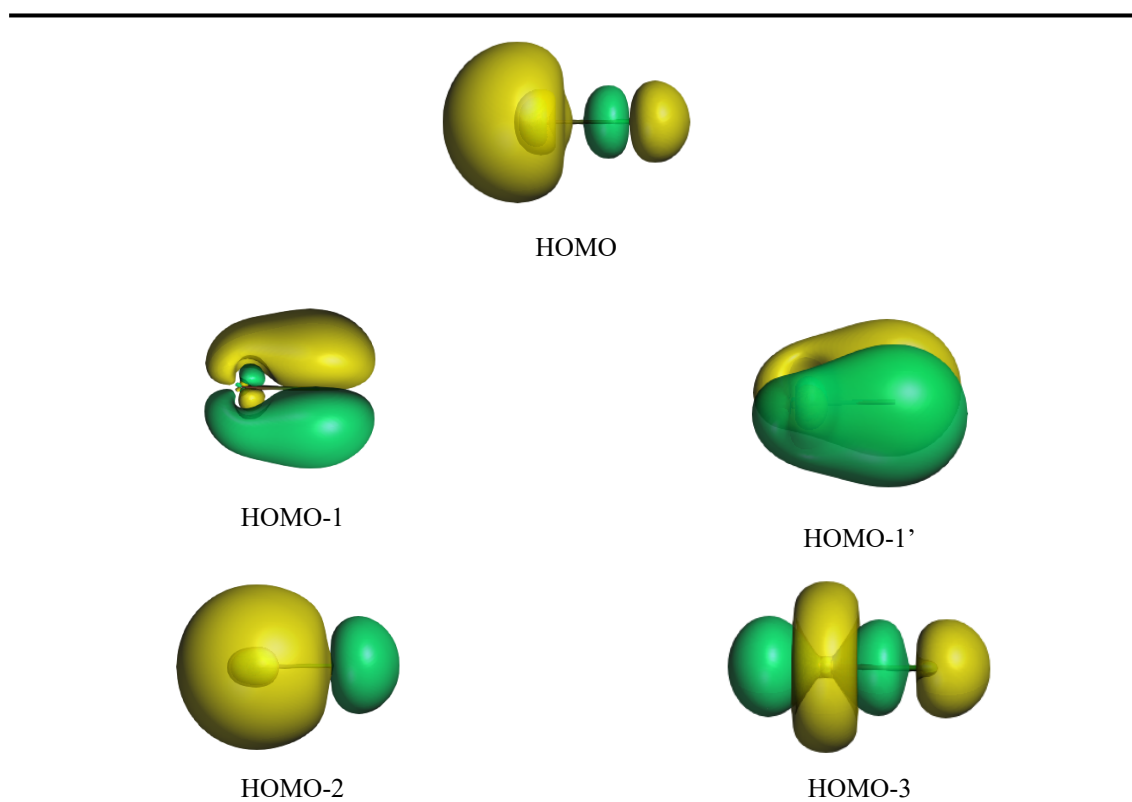

**Figure S8.** Molecular orbital results of InF at the BP86/DZP//BP86/def2-QZVPP level of theory.

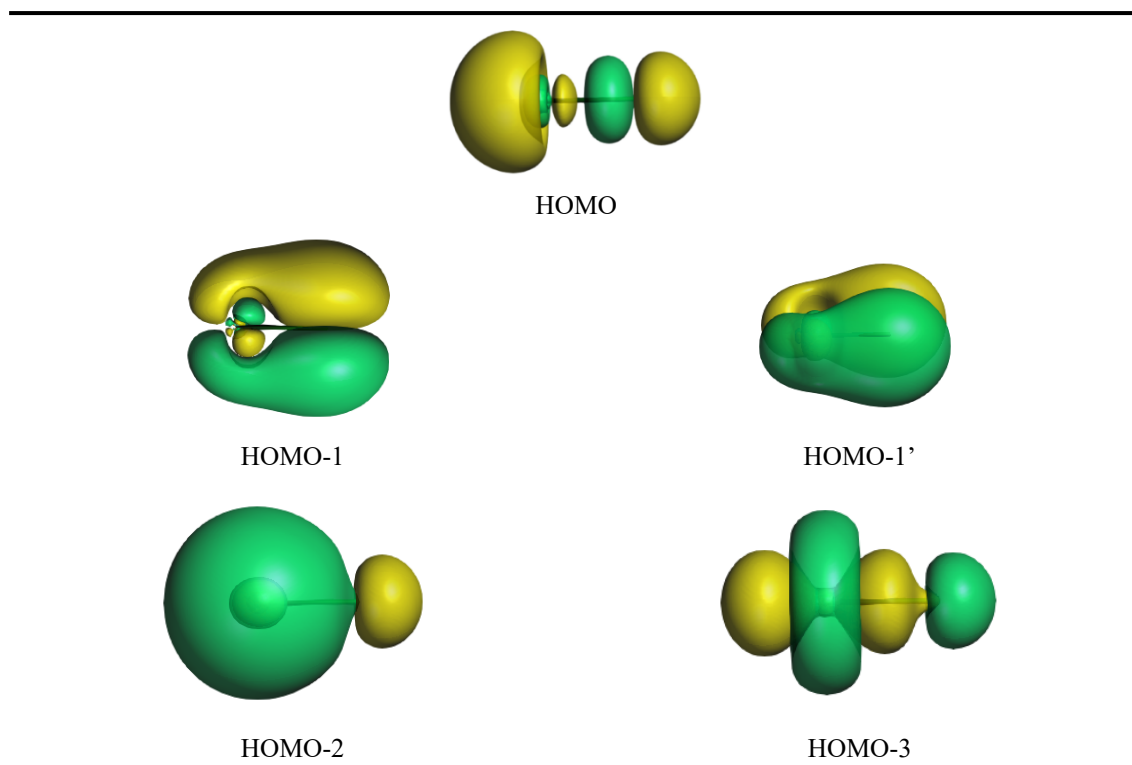

**Figure S9.** Molecular orbital results of TIF at the BP86/DZP//BP86/def2-QZVPP level of theory.

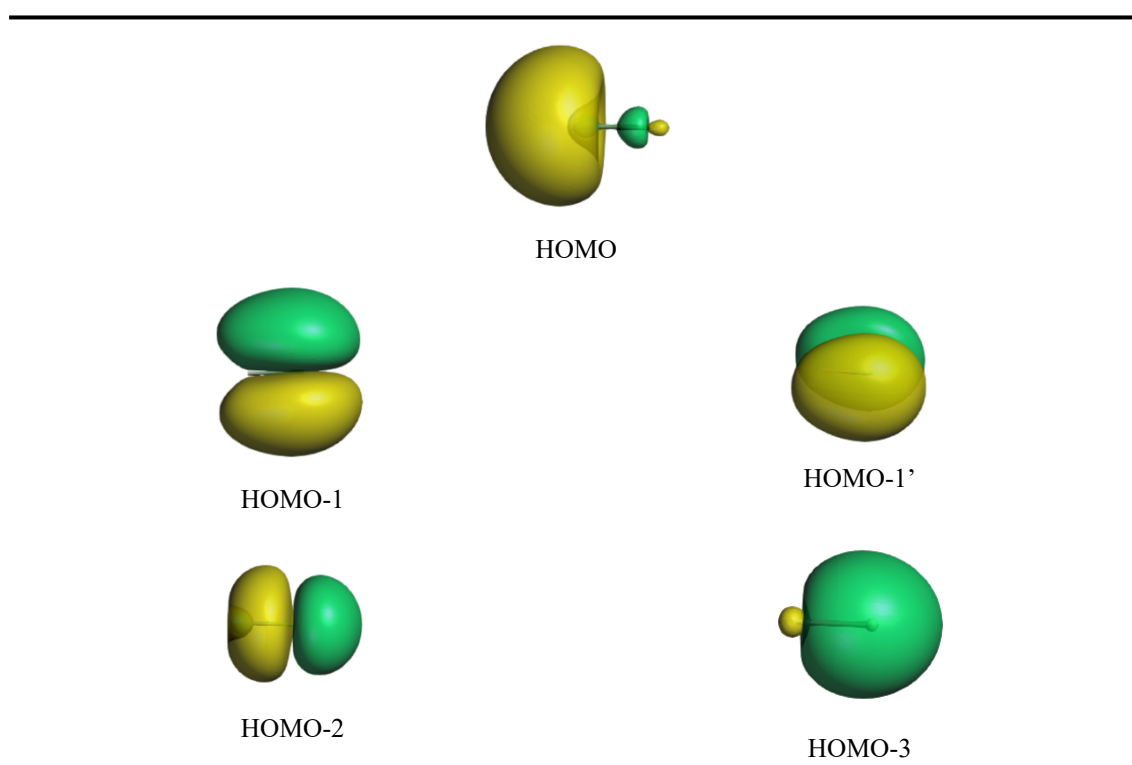

**Figure S10.** Molecular orbital results of BeF<sup>-</sup> at the BP86/DZP//BP86/def2-QZVPP level of theory.

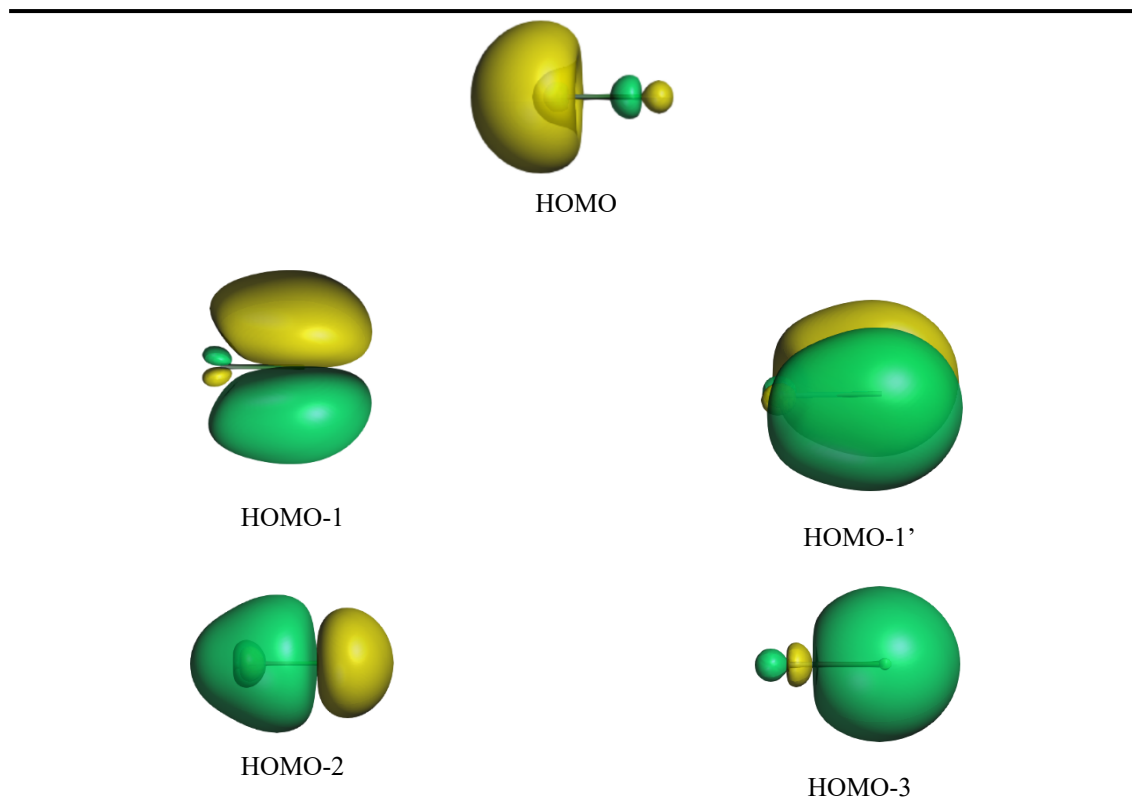

**Figure S11.** Molecular orbital results of MgF<sup>-</sup> at the BP86/DZP//BP86/def2-QZVPP level of theory.

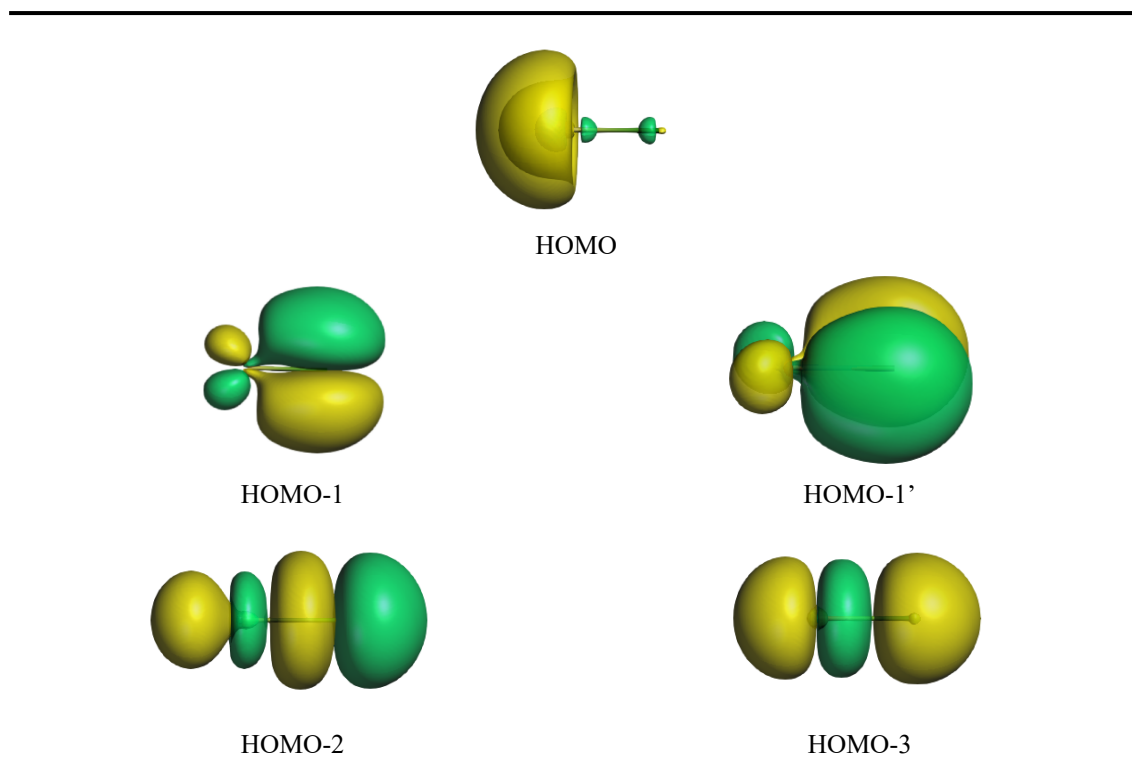

**Figure S12.** Molecular orbital results of CaF<sup>-</sup> at the BP86/DZP//BP86/def2-QZVPP level of theory.

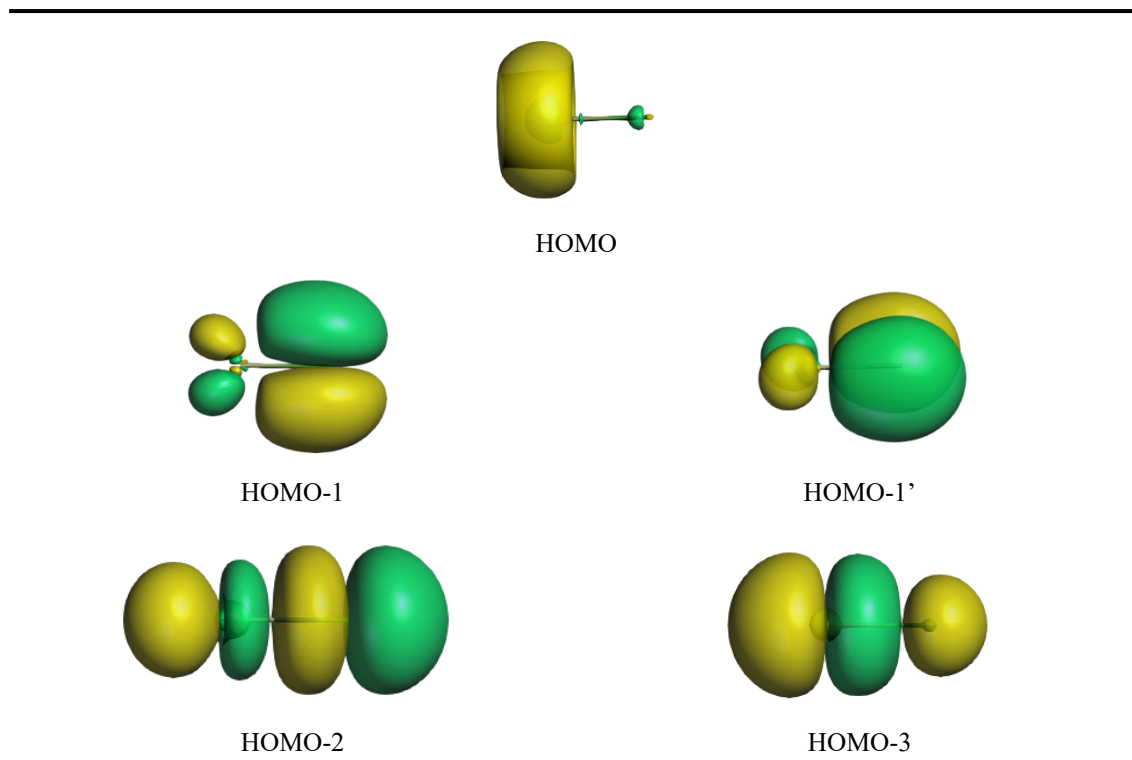

**Figure S13.** Molecular orbital results of SrF<sup>-</sup> at the BP86/DZP//BP86/def2-QZVPP level of theory.

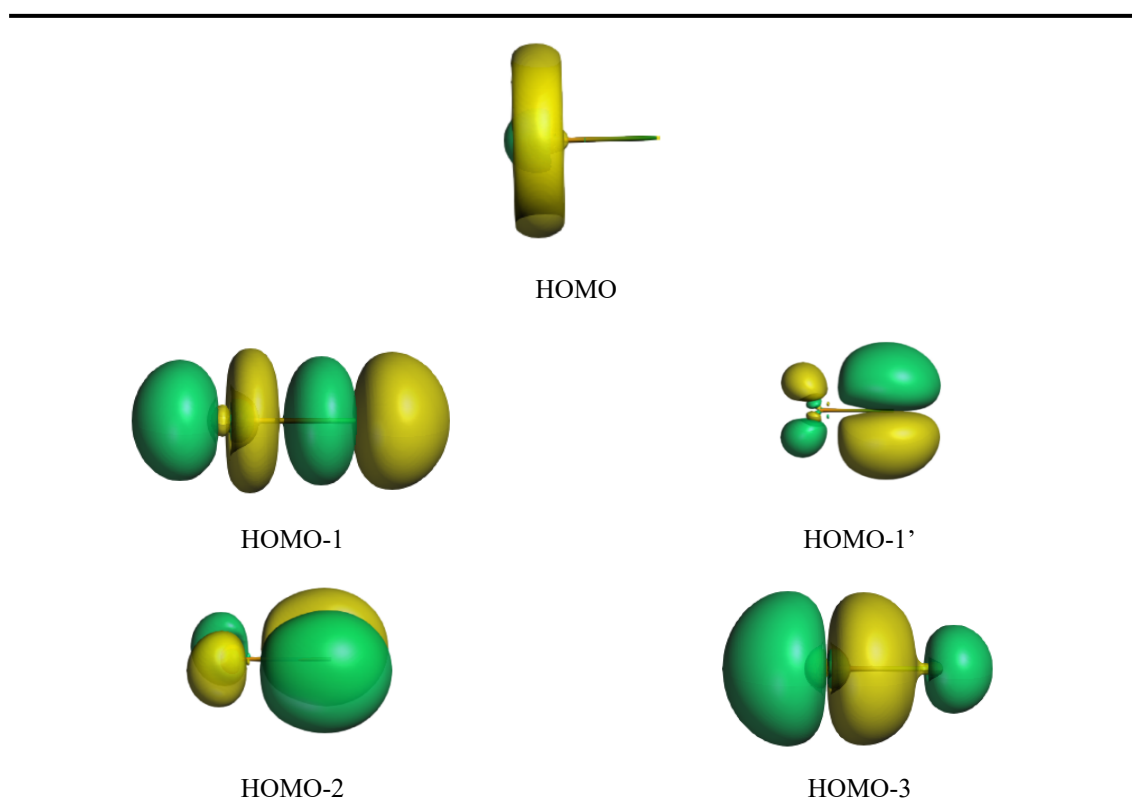

**Figure S14.** Molecular orbital results of BaF<sup>-</sup> at the BP86/DZP//BP86/def2-QZVPP level of theory.

**Table S1.** Coordinates and energies (in hartrees) of the calculated structures at the BP86/def2-QZVPP level

**BF**

Energy = -124.7152906

|   |             |             |              |
|---|-------------|-------------|--------------|
| B | 0.000000000 | 0.000000000 | -0.819193000 |
| F | 0.000000000 | 0.000000000 | 0.455107000  |

**AlF**

Energy = -342.4192829

|    |             |             |              |
|----|-------------|-------------|--------------|
| Al | 0.000000000 | 0.000000000 | 0.688356000  |
| F  | 0.000000000 | 0.000000000 | -0.994292000 |

**GaF**

Energy = -2025.1153596

|    |             |             |              |
|----|-------------|-------------|--------------|
| Ga | 0.000000000 | 0.000000000 | 0.406232000  |
| F  | 0.000000000 | 0.000000000 | -1.399244000 |

**InF**

Energy = -290.2134576

|    |             |             |              |
|----|-------------|-------------|--------------|
| In | 0.000000000 | 0.000000000 | 0.313141000  |
| F  | 0.000000000 | 0.000000000 | -1.704880000 |

**TlF**

Energy = -272.6189483

|    |             |             |              |
|----|-------------|-------------|--------------|
| Tl | 0.000000000 | 0.000000000 | 0.212245000  |
| F  | 0.000000000 | 0.000000000 | -1.910206000 |

**BeF<sup>-</sup>**

Energy = -114.6950633

|                |             |             |              |
|----------------|-------------|-------------|--------------|
| Be             | 0.000000000 | 0.000000000 | -0.988605000 |
| F <sup>-</sup> | 0.000000000 | 0.000000000 | 0.439380000  |

**MgF<sup>-</sup>**

Energy = -300.0838313

|                |             |             |              |
|----------------|-------------|-------------|--------------|
| Mg             | 0.000000000 | 0.000000000 | 0.791494000  |
| F <sup>-</sup> | 0.000000000 | 0.000000000 | -1.055325000 |

**CaF<sup>-</sup>**

Energy = -777.6606903

|                |             |             |              |
|----------------|-------------|-------------|--------------|
| Ca             | 0.000000000 | 0.000000000 | 0.618059000  |
| F <sup>-</sup> | 0.000000000 | 0.000000000 | -1.373464000 |

**SrF<sup>-</sup>**

Energy = -130.7484136

|                |             |             |              |
|----------------|-------------|-------------|--------------|
| Sr             | 0.000000000 | 0.000000000 | 0.408590000  |
| F <sup>-</sup> | 0.000000000 | 0.000000000 | -1.725156000 |

**BaF<sup>-</sup>**

Energy = -125.5447411

|                |             |             |              |
|----------------|-------------|-------------|--------------|
| Ba             | 0.000000000 | 0.000000000 | 0.309329000  |
| F <sup>-</sup> | 0.000000000 | 0.000000000 | -1.924712000 |

**Table S2.** Coordinates and energies (in hartrees) of the calculated structures at the CCSD(T)/def2-TZVPP level

**BeF<sup>-</sup>**

Energy = -114.4774285

|                |             |             |              |
|----------------|-------------|-------------|--------------|
| Be             | 0.000000000 | 0.000000000 | -0.989218000 |
| F <sup>-</sup> | 0.000000000 | 0.000000000 | 0.439652000  |

**MgF<sup>-</sup>**

Energy = -299.4693446

|                |             |             |              |
|----------------|-------------|-------------|--------------|
| F <sup>-</sup> | 0.000000000 | 0.000000000 | -1.051416000 |
| Mg             | 0.000000000 | 0.000000000 | 0.788562000  |

**CaF<sup>-</sup>**

Energy = -776.6118451

|                |             |             |              |
|----------------|-------------|-------------|--------------|
| F <sup>-</sup> | 0.000000000 | 0.000000000 | -1.451243000 |
| Ca             | 0.000000000 | 0.000000000 | 0.653059000  |

**SrF<sup>-</sup>**

Energy = -130.216534

|                |             |             |              |
|----------------|-------------|-------------|--------------|
| F <sup>-</sup> | 0.000000000 | 0.000000000 | -1.808251000 |
| Sr             | 0.000000000 | 0.000000000 | 0.428270000  |

**BaF<sup>-</sup>**

Energy = -124.9654535

|                |             |             |              |
|----------------|-------------|-------------|--------------|
| F <sup>-</sup> | 0.000000000 | 0.000000000 | -2.067115000 |
| Ba             | 0.000000000 | 0.000000000 | 0.332215000  |

**BF**

Energy = -124.505751

|   |             |             |              |
|---|-------------|-------------|--------------|
| B | 0.000000000 | 0.000000000 | -0.818103000 |
| F | 0.000000000 | 0.000000000 | 0.454502000  |

**AlF**

Energy = -341.8021909

|    |             |             |              |
|----|-------------|-------------|--------------|
| F  | 0.000000000 | 0.000000000 | -0.983676000 |
| Al | 0.000000000 | 0.000000000 | 0.681006000  |

**GaF**

Energy = -2023.2565034

|    |             |             |              |
|----|-------------|-------------|--------------|
| F  | 0.000000000 | 0.000000000 | -1.379868000 |
| Ga | 0.000000000 | 0.000000000 | 0.400607000  |

**InF**

Energy = -289.2860866

|    |             |             |              |
|----|-------------|-------------|--------------|
| F  | 0.000000000 | 0.000000000 | -1.679783000 |
| In | 0.000000000 | 0.000000000 | 0.308532000  |

**TlF**

Energy = -271.724248

|    |             |             |              |
|----|-------------|-------------|--------------|
| F  | 0.000000000 | 0.000000000 | -1.886248000 |
| Tl | 0.000000000 | 0.000000000 | 0.209583000  |
